# Supplementary material for: Intercomparison of long-term ground-based measurements of tropospheric and stratospheric ozone at Lauder, New Zealand (45S)
Source: Copernicus journal article supplement (doi:10.5194/egusphere-2023-2668), 2023-11-20
Supplement: Supplementary file [file egusphere-2023-2668-CC1-supplement.pdf]

Comments by Owen R. Cooper (TOAR Scientific Coordinator of the Community Special Issue) on:

### **Intercomparison of long-term ground-based measurements of tropospheric and stratospheric ozone at Lauder, New Zealand (45S)**

Robin Björklund (corresponding author), Corinne Vigouroux, Peter Effertz, Omaira Garcia, Alex Geddes, James Hannigan, Koji Miyagawa, Michael Kotkamp, Bavo Langerock, Gerald Nedoluha, Ivan Ortega, Irina Petropavlovskikh, Deniz Poyraz, Richard Querel, John Robinson, Hisako Shiona, Dan Smale, Penny Smale, Roeland Van Malderen, and Martine De Mazière

This manuscript was submitted to AMT as part of the TOAR-II Community Special Issue

<https://doi.org/10.5194/egusphere-2023-2668>, 2023

Preprint. Discussion started: November 20, 2023; discussion closes January 13, 2023

This review is by Owen Cooper, TOAR Scientific Coordinator of the TOAR-II Community Special Issue. I, or a member of the TOAR-II Steering Committee, will post comments on all papers submitted to the TOAR-II Community Special Issue, which is an inter-journal special issue accommodating submissions to six Copernicus journals: ACP (lead journal), AMT, GMD, ESSD, ASCMO and BG. The primary purpose of these reviews is to identify any discrepancies across the TOAR-II submissions, and to allow the author teams time to address the discrepancies. Additional comments may be included with the reviews. While O. Cooper and members of the TOAR Steering Committee may post open comments on papers submitted to the TOAR-II Community Special Issue, they are not involved with the decision to accept or reject a paper for publication, which is entirely handled by the journal's editorial team.

#### **General comments:**

This paper presents a thorough multi-instrument comparison of total column ozone, stratospheric ozone and tropospheric ozone above Lauder, New Zealand focusing on the period 2000-2022. My comments will focus on just the tropospheric portion of the analysis. While typical measurement uncertainties are considered, the issue of low sampling frequency also needs to be addressed. As described below, low sampling frequency is a major challenge to accurate trend quantification. However, because Lauder has high quality observations from several instruments this analysis provides an excellent opportunity to calculate the tropospheric ozone trend by merging all available data. The method of calculating ozone trends and anomalies based on the merging of data from nearby stations has been done several times before (Cooper et al., 2010; Tarasick et al., 2010; Gaudel et al., 2018; Steinbrecht et al., 2021; Chang et al., 2022), but this paper could produce the first (as far as I am aware) ozone trend analysis that merges three data sets at a single location. By merging the data sets and greatly increasing the sample size the authors may succeed in reducing the uncertainty on the long-term trend, which could serve as a model for future TOAR-II trend studies.

Between 1988 and 2020 five papers appeared in the peer-reviewed literature showing that a low sampling rate of just once per week (based on ozonesondes) either failed to produce an accurate monthly/seasonal mean (Logan 1999; Saunio et al., 2012), or failed to produce an accurate trend (Prinn, 1988; Cooper et al., 2010; Chang et al., 2020). While these papers have been around for a long time, the sampling issue is often overlooked. Chang et al. (2023) have written a new paper on ozone sampling rates and they offer some suggestions for improved trend detection when faced with low sampling rates (this paper will soon appear as a submission to the TOAR-II Special Issue). The simplest

solution is to boost the sampling rate, and in the case of Björklund et al. (2023) that can be achieved by merging the ozonesonde, FTIR and Umkehr records at Lauder. According to Table 1 the merged data set could have more than 10 profiles per week, although probably only for the most recent years, as earlier years had gaps, and Figure 1 seems to indicate lower sampling rates before 2012. Table 5 shows that the individual trends from ozonesondes, Umkehr and FTIR have similar magnitudes but all have relatively wide 95% confidence intervals. A merged data set may produce a trend that is more accurate and with lower uncertainty. This finding would also be relevant to the first paper published in the TOAR-II Community Special Issue. Pope et al. (2023) developed a new satellite ozone product that indicates broad ozone increases across much of the globe from 1996 to 2017. The product shows a weak ozone increase above New Zealand, while the trend based on the sparse Lauder ozonesonde record shows no trend. Would a merged ozone time series based on ozonesondes, FTIR and Umkehr reconcile this discrepancy?

### **Comments regarding TOAR-II guidelines:**

TOAR-II has produced two guidance documents to help authors develop their manuscripts so that results can be consistently compared across the wide range of studies that will be written for the TOAR-II Community Special Issue. Both guidance documents can be found on the TOAR-II webpage: <https://igacproject.org/activities/TOAR/TOAR-II>

*The TOAR-II Community Special Issue Guidelines:* In the spirit of collaboration and to allow TOAR-II findings to be directly comparable across publications, the TOAR-II Steering Committee has issued this set of guidelines regarding style, units, plotting scales, regional and tropospheric column comparisons, and tropopause definitions.

*The TOAR-II Recommendations for Statistical Analyses:* The aim of this guidance note is to provide recommendations on best statistical practices and to ensure consistent communication of statistical analysis and associated uncertainty across TOAR publications. The scope includes approaches for reporting trends, a discussion of strengths and weaknesses of commonly used techniques, and calibrated language for the communication of uncertainty. Table 3 of the TOAR-II statistical guidelines provides calibrated language for describing trends and uncertainty, similar to the approach of IPCC, which allows trends to be discussed without having to use the problematic expression, “statistically significant”.

It would be helpful for TOAR-II if the submitted paper can describe the trend detection method that was applied (e.g. linear least squares, quantile regression, multiple linear regression), report all trends with 95% confidence intervals and p-values, and avoid using the expression, “statistically significant”. Based on the highly influential paper by Wasserstein et al. (2019), TOAR first abandoned the expression “statistically significant” with the *TOAR-Observations* paper (Tarasick and Galbally et al., 2019), and we now ask the author teams to describe their confidence in a trend using the calibrated language in the statistical guidelines. In addition, to facilitate trend comparisons across TOAR-II papers, trends should also be reported in units of  $\text{nmol mol}^{-1}$  per decade (it’s fine to also report trends in units of percent per decade, as currently shown in the submitted manuscript).

## Additional Comments:

References to the WMO 2018 ozone assessment should be updated with the 2022 edition.

Reference to the National Research Council 1991 report needs to be updated with a modern review of the impact of ozone on human health.

When providing a summary of global tropospheric ozone trends, the TOAR paper by Gaudel et al. (2018) has been superseded by IPCC AR6, which assessed an increase of the tropospheric ozone burden since the 1990s in both the tropics and northern mid-latitudes (Gulev et al., 2021; Szopa et al., 2021).

## References

- Chang, K.-L., O. R. Cooper, A. Gaudel, I. Petropavlovskikh and V. Thouret (2020), Statistical regularization for trend detection: An integrated approach for detecting long-term trends from sparse tropospheric ozone profiles, *Atmos. Chem. Phys.*, 20, 9915–9938, <https://doi.org/10.5194/acp-20-9915-2020>
- Chang, K.-L., O. R. Cooper, A. Gaudel, M. Allaart, G. Ancellet, H. Clark, S. Godin-Beekmann, T. Leblanc, R. Van Malderen, P. Nédélec, I. Petropavlovskikh, W. Steinbrecht, R. Stübi, D. W. Tarasick, C. Torres (2022), Impact of the COVID-19 economic downturn on tropospheric ozone trends: an uncertainty weighted data synthesis for quantifying regional anomalies above western North America and Europe, *AGU Advances*, 3, e2021AV000542. <https://doi.org/10.1029/2021AV000542>
- Chang, K.-L., O. R. Cooper, A. Gaudel, B. C. McDonald, I. Petropavlovskikh, P. Effertz and Gary Morris (2023), Challenges of detecting free tropospheric ozone trends in a sparsely sampled environment, submitted to the TOAR-II Community Special Issue, ACP.
- Cooper, O. R., D. D. Parrish, A. Stohl, M. Trainer, P. Nédélec, V. Thouret, J. P. Cammas, S. J. Oltmans, B. J. Johnson, D. Tarasick, T. Leblanc, I. S. McDermid, D. Jaffe, R. Gao, J. Stith, T. Ryerson, K. Aikin, T. Campos, A. Weinheimer and M. A. Avery (2010), Increasing springtime ozone mixing ratios in the free troposphere over western North America, *Nature*, 463, 344-348, doi:10.1038/nature08708
- Gaudel, A., O. R. Cooper, et al. (2018), Tropospheric Ozone Assessment Report: Present-day distribution and trends of tropospheric ozone relevant to climate and global atmospheric chemistry model evaluation, *Elem. Sci. Anth.*, 6(1):39, DOI: <https://doi.org/10.1525/elementa.291>
- Gulev, S.K., P.W. Thorne, J. Ahn, F.J. Dentener, C.M. Domingues, S. Gerland, D. Gong, D.S. Kaufman, H.C. Nnamchi, J. Quaas, J.A. Rivera, S. Sathyendranath, S.L. Smith, B. Trewin, K. von Schuckmann, and R.S. Vose, 2021: Changing State of the Climate System. In *Climate Change 2021: The Physical Science Basis. Contribution of Working Group I to the Sixth Assessment Report of the Intergovernmental Panel on Climate Change* [Masson-Delmotte, V., P. Zhai, A. Pirani, S.L. Connors, C. Péan, S. Berger, N. Caud, Y. Chen, L. Goldfarb, M.I. Gomis, M. Huang, K. Leitzell, E. Lonnoy, J.B.R. Matthews, T.K. Maycock, T. Waterfield, O. Yelekçi, R. Yu, and B. Zhou (eds.)]. Cambridge University Press, Cambridge, United Kingdom and New York, NY, USA, pp. 287–422, doi:10.1017/9781009157896.004
- Logan, J. A.: An analysis of ozonesonde data for the troposphere: Recommendations for testing 3-D models and development of a gridded climatology for tropospheric ozone, *Journal of Geophysical Research: Atmospheres*, 104, 16 115–16 149, 1999.

- Pope, R. J., Kerridge, B. J., Siddans, R., Latter, B. G., Chipperfield, M. P., Feng, W., Pimlott, M. A., Dhomse, S. S., Retscher, C., and Rigby, R.: Investigation of spatial and temporal variability in lower tropospheric ozone from RAL Space UV–Vis satellite products, *Atmos. Chem. Phys.*, 23, 14933–14947, <https://doi.org/10.5194/acp-23-14933-2023>, 2023
- Prinn, R.G., 1988. Toward an improved global network for determination of tropospheric ozone climatology and trends. *Journal of atmospheric chemistry*, 6, pp.281-298.
- Saunoy, M., Emmons, L., Lamarque, J.-F., Tilmes, S., Wespes, C., Thouret, V., and Schultz, M.: Impact of sampling frequency in the analysis of tropospheric ozone observations, *Atmospheric Chemistry and Physics*, 12, 6757–6773, <https://doi.org/10.5194/acp-12-6757-2012>, 2012.
- Steinbrecht, Wolfgang, Dagmar Kubistin, Christian Plass-Dülmer, Jonathan Davies, David W. Tarasick, Peter von der Gathen, Holger Deckelmann, Nis Jepsen, Rigel Kivi, Norrie Lyall, Matthias Palm, Justus Notholt, Bogumil Kois, Peter Oelsner, Marc Allaart, Ankie Piters, Michael Gill, Roeland Van Malderen, Andy W. Delcloo, Ralf Sussmann, Emmanuel Mahieu, Christian Servais, Gonzague Romanens, Rene Stübi, Gerard Ancellet, Sophie Godin-Beekmann, Shoma Yamanouchi, Kimberly Strong, Bryan Johnson, Patrick Cullis, Irina Petropavlovskikh, James W. Hannigan, Jose-Luis Hernandez, Ana Diaz Rodriguez, Tatsumi Nakano, Fernando Chouza, Thierry Leblanc, Carlos Torres, Omaira Garcia, Amelie N. Röhlings, Matthias Schneider, Thomas Blumenstock, Matt Tully, Clare Paton-Walsh, Nicholas Jones, Richard Querel, Susan Strahan, Ryan M. Stauffer, Anne M. Thompson, Antje Inness, Richard Engelen, Kai-Lan Chang, Owen R. Cooper (2021), COVID-19 Crisis Reduces Free Tropospheric Ozone Across the Northern Hemisphere, *Geophysical Research Letters*, 48, e2020GL091987. <https://doi.org/10.1029/2020GL091987>
- Szopa, S., V. Naik, B. Adhikary, P. Artaxo, T. Berntsen, W.D. Collins, S. Fuzzi, L. Gallardo, A. Kiendler-Scharr, Z. Klimont, H. Liao, N. Unger, and P. Zanis, 2021: Short-Lived Climate Forcers. In *Climate Change 2021: The Physical Science Basis. Contribution of Working Group I to the Sixth Assessment Report of the Intergovernmental Panel on Climate Change* [Masson-Delmotte, V., P. Zhai, A. Pirani, S.L. Connors, C. Péan, S. Berger, N. Caud, Y. Chen, L. Goldfarb, M.I. Gomis, M. Huang, K. Leitzell, E. Lonnoy, J.B.R. Matthews, T.K. Maycock, T. Waterfield, O. Yelekçi, R. Yu, and B. Zhou (eds.)]. Cambridge University Press, Cambridge, United Kingdom and New York, NY, USA, pp. 817–922, doi:10.1017/9781009157896.008
- Tarasick, DW, et al. 2010. High-resolution tropospheric ozone fields for INTEX and ARCTAS from IONS ozonesondes. *J. Geophys. Res.* 115(D20): 301. DOI:<https://doi.org/10.1029/2009JD012918>
- Tarasick, D. W., I. E. Galbally, O. R. Cooper, M. G. Schultz, G. Ancellet, T. Leblanc, T. J. Wallington, J. Ziemke, X. Liu, M. Steinbacher, J. Staehelin, C. Vigouroux, J. W. Hannigan, O. Garcia, G. Foret, P. Zanis, E. Weatherhead, I. Petropavlovskikh, H. Worden, M. Osman, J. Liu, K.-L. Chang, A. Gaudel, M. Lin, M. Granados-Muñoz, A. M. Thompson, S. J. Oltmans, J. Cuesta, G. Dufour, V. Thouret, B. Hassler, T. Trickl and J. L. Neu (2019), Tropospheric Ozone Assessment Report: Tropospheric ozone from 1877 to 2016, observed levels, trends and uncertainties. *Elem Sci Anth*, 7(1), DOI: <http://doi.org/10.1525/elementa.376>
- Wasserstein, R. L., Schirm, A. L., and Lazar, N. A.: Moving to a world beyond  $p < 0:05$ , *Am. Stat.*, 73, 1–29, <https://doi.org/10.1080/00031305.2019.1583913>, 2019.
